# Supplementary material for: Hemap: An Interactive Online Resource for Characterizing Molecular Phenotypes across Hematologic Malignancies
Source: Oxford University Press journal article supplement (doi:10.1158/0008-5472.can-18-2970), 2019-04-02
Supplement: 00085472can182970-sup-209119_2_supp_5419307_p4vkkn.xlsx [file 00085472can182970-sup-209119_2_supp_5419307_p4vkkn.xlsx]

## Sheet: Summary
Table S7. Cell surface genes as candidate drug targets
High confidence targets (from Cell Surface Protein Atlas). Summary of drug target gene enrichment across the disease hierarchy. Disease-specific summaries are based on association by most significant enrichment (-log10 P-values shown). The two last data sheets include all P-values obtained, reported separately for targets with disease-specific expression and those with similar expression in norma…
Disease context	Number of targets
Pan-Cancer	134
Several Lymphomas	136
Several Leukemias	48
Disease-specific clusters*	215
Disease subtype clusters*	146
* clusters analyzed have at least 90% of samples of the same annotated cancer type category
Literature-based validation for top pre-B-ALL surface targets
Gene	Function	Validation type	References
CLEC14A	cell-cell adhesion and angiogenesis	this study and surface proteomics	not reported in other studies (this study and Mirkowska P et al, ref no 44)
DPEP1	membrane enzyme	this study and surface proteomics	not reported in other studies (this study and Mirkowska P et al, ref no 44)
CELSR2	unknown	this study and surface proteomics	not reported in other studies (this study and Mirkowska P et al, ref no 44)
MME	endopeptidase	protein levels	1) Brown et al. J Natl Cancer Inst. 1975;55(6):1281-9. 2) Pui CH et al. Leukemia. 1993;7(1):35-40.
SDK2	unknown	this study and surface proteomics	not reported in other studies (this study and Mirkowska P et al, ref no 44)
INSR	insulin receptor	this study and surface proteomics	not reported in other studies (this study and Mirkowska P et al, ref no 44)
GPM6B	actin and cytoskeleton networks	mRNA and protein levels	1) Chow YP et al. BMC Cancer. 2017;17(1):120. 2) Charfi et al. Cell Oncol (Dordr). 2014 Jun;37(3):179-91.
ELFN2	unknown	this study and surface proteomics	not reported in other studies (this study and Mirkowska P et al, ref no 44)
FLT3	growth factor receptor	mRNA and protein levels	Carow CE et al. Blood. 1996;87(3):1089-96.
SLC22A16	doxorubicin transporter	mRNA levels	1) Okabe M. et al Biochem Biophys Res Commun. 2005;333(3):754-62. 2) Wu Y. et al. Apoptosis. 2015;20(8):1099-108.
FLT4	growth factor, lymphangiogenesis	mRNA and protein levels	1) Dias S et al. Blood. 2002 Mar 15;99(6):2179-84. 2) Quentmeyer et al. BMC Cancer. 2012 Jan 17;12:19. (cell line data)
APCDD1	inhibitor of the Wnt signaling pathway	this study and surface proteomics	not reported in other studies (this study and Mirkowska P et al, ref no 44)

## Sheet: Gene list
Gene list
A2M
ABCA7
ABCA8
ABCB1
ABCC1
ABI3BP
ACE
ACHE
ACKR3
ACP2
ACTN1
ACVR1
ACVR2A
ACVR2B
ADAM10
ADAM12
ADAM15
ADAM17
ADAM19
ADAM22
ADAM8
ADAM9
ADAMTS15
ADAMTSL4
ADGRA2
ADGRA3
ADGRE2
ADGRE3
ADGRE5
ADGRF1
ADGRF5
ADGRG1
ADGRG2
ADGRG6
ADGRL2
ADGRL4
ADORA1
ADRA2A
ADRA2C
ADRB2
AEBP1
AGRN
AGTR1
AGTR2
AHSG
ALCAM
ALPL
ALPP
AMBP
AMICA1
AMIGO1
AMIGO2
ANGPT1
ANGPTL1
ANGPTL2
ANGPTL4
ANO5
ANO6
ANO9
ANPEP
ANTXR1
APCDD1
APLNR
APLP1
APLP2
APOB
APOD
APOH
AREG
ARSF
ASIC1
ASPN
ATP1A1
ATP1A3
ATP1B1
ATP1B2
ATP1B3
ATP6AP1
ATP6V0A2
ATRAID
ATRN
AXL
BACE1
BCAM
BCAN
BCHE
BDNF
BGN
BMP1
BMPR2
BSG
BST1
BST2
BTD
BTLA
BTN2A1
BTN3A3
BVES
C10orf54
C11orf24
C12orf49
C1orf159
C1QTNF2
C3
C4A
C4BPA
C4BPB
C6orf120
C6orf25
CA12
CACHD1
CACNA2D1
CACNA2D2
CADM1
CADM2
CADM3
CADM4
CALCRL
CALR
CALU
CANX
CAPNS1
CASD1
CCDC126
CCDC80
CCR4
CCR7
CD101
CD109
CD14
CD160
CD163
CD164
CD180
CD19
CD1B
CD1C
CD1D
CD2
CD200
CD200R1
CD22
CD226
CD244
CD27
CD274
CD276
CD28
CD302
CD33
CD34
CD3D
CD3G
CD4
CD40
CD40LG
CD44
CD46
CD47
CD48
CD5
CD55
CD58
CD59
CD6
CD63
CD68
CD7
CD74
CD79A
CD79B
CD80
CD83
CD84
CD86
CD96
CDCP1
CDH1
CDH10
CDH11
CDH13
CDH15
CDH17
CDH19
CDH2
CDH3
CDH4
CDH5
CDH6
CDH8
CDH9
CDON
CDSN
CEACAM1
CEACAM6
CEACAM8
CELSR1
CELSR2
CELSR3
CFH
CGN
CHGA
CHL1
CHRNA3
CLCA2
CLDN12
CLEC12A
CLEC14A
CLEC2D
CLEC5A
CLMP
CLU
CMKLR1
CNNM2
CNNM3
CNNM4
CNR2
CNTFR
CNTN1
CNTN3
CNTNAP1
CNTNAP2
COL11A1
COL12A1
COL14A1
COL1A1
COL1A2
COL26A1
COL2A1
COL3A1
COL5A1
COL5A2
COL5A3
COL6A1
COL6A2
COL6A3
COL6A5
COL6A6
COL7A1
CP
CPD
CPM
CPQ
CPZ
CR1
CR2
CRB2
CREG1
CRELD2
CRIM1
CRLF1
CRLF2
CRTAP
CSF1
CSF2RA
CSF2RB
CSPG4
CSPG5
CTSD
CXADR
CXCL16
CXCR1
CXCR3
CXCR5
CYBB
CYSLTR1
CYTH1
DAG1
DCBLD1
DCBLD2
DCHS1
DCN
DCT
DDR2
DGCR2
DKK3
DMXL2
DNER
DPEP1
DPP4
DPP7
DSC2
DSG2
DYNC2H1
ECE1
EDNRA
EFEMP1
EFNA1
EFNA4
EFNA5
EFNB1
EFNB2
EFNB3
EGFR
ELFN1
ELFN2
EMB
EMC1
EMILIN1
EMILIN2
ENG
ENO1
ENPP1
ENPP3
ENPP4
EPCAM
EPDR1
EPHA1
EPHA2
EPHA3
EPHA4
EPHA5
EPHB1
EPHB2
EPHB3
EPHB4
ERBB2
ERBB3
ESAM
EVI2A
EXTL2
F11R
F13A1
F2
F2R
F2RL3
F3
F5
FAM171A1
FAM171A2
FAM174A
FAM174B
FAP
FAS
FAT1
FAT3
FAT4
FBLN2
FBN1
FBN2
FCAR
FCER2
FCGR1A
FCGR1C
FCGR2A
FCGR2B
FCGR3A
FCGR3B
FCGRT
FCRL2
FCRL3
FCRL5
FCRL6
FGA
FGB
FGFR1
FGFR2
FGFR3
FGFR4
FGFRL1
FGL2
FKRP
FLRT1
FLRT2
FLT1
FLT3
FLT4
FN1
FNDC5
FOLR1
FRAS1
FREM2
FSTL1
FZD4
GABRA2
GABRB3
GALNT1
GDF15
GFRA1
GFRA2
GLG1
GLMP
GNPTG
GP5
GPC1
GPC4
GPC5
GPI
GPM6B
GPNMB
GPR107
GPR132
GPR174
GPR176
GPR39
GPR65
GPRC5A
GREM1
GRIA2
GRID1
GRIK3
GRN
HEG1
HEPACAM
HEPACAM2
HFE
HHIP
HHLA2
HLA-A
HLA-B
HLA-C
HLA-DPA1
HLA-DPB1
HLA-DQA1
HLA-DQA2
HLA-DQB1
HLA-DQB2
HLA-DRA
HLA-DRB1
HLA-DRB3
HLA-DRB4
HLA-DRB5
HLA-E
HLA-F
HMCN1
HNRNPK
HP
HPX
HSPG2
HTR1D
HTR2B
HYAL2
ICAM1
ICAM2
ICAM3
ICAM5
ICOSLG
IFI30
IFNAR1
IFNAR2
IFNGR1
IGDCC4
IGF1R
IGF2R
IGFBP3
IGHG1
IGHG2
IGHG4
IGHM
IGLON5
IGSF1
IGSF3
IGSF8
IL10RA
IL10RB
IL13RA1
IL13RA2
IL17D
IL17RA
IL17RB
IL17RD
IL18R1
IL1R1
IL1R2
IL1RAP
IL1RL2
IL27RA
IL2RA
IL2RB
IL2RG
IL3RA
IL4R
IL5RA
IL6ST
IL7R
INHBE
INSR
ISLR
ITFG1
ITGA1
ITGA10
ITGA11
ITGA2
ITGA2B
ITGA3
ITGA4
ITGA5
ITGA6
ITGA7
ITGA8
ITGA9
ITGAE
ITGAL
ITGAM
ITGAV
ITGAX
ITGB1
ITGB2
ITGB3
ITGB4
ITGB5
ITGB6
ITGB7
ITGB8
ITIH2
ITM2B
ITPRIP
JAG1
JAG2
JAM2
JAM3
KCNA3
KIAA0922
KIAA1324L
KIAA1919
KIR2DL3
KIR2DL5A
KIR2DS1
KIR2DS4
KIR3DL1
KIRREL
KIT
KITLG
KLRG1
KNG1
KRT1
L1CAM
LAIR1
LAMA1
LAMA2
LAMA3
LAMA4
LAMA5
LAMB1
LAMB2
LAMB3
LAMC1
LAMC2
LAMP1
LAMP2
LAMP3
LDLR
LEPR
LGALS3BP
LIFR
LILRA1
LILRA5
LILRB1
LIPG
LMAN2
LMAN2L
LNPEP
LOX
LOXL4
LPAR5
LRFN1
LRP1
LRP10
LRP11
LRP12
LRP1B
LRP2
LRP4
LRP5
LRRC15
LRRC25
LRRC32
LRRC4B
LRRN1
LRRN4CL
LSAMP
LTB4R
LTBP1
LTBP3
LTBR
LTF
LUM
LY6K
LY75
LY9
LYPD3
M6PR
MAN2B2
MCAM
MCOLN1
MDGA1
MEGF8
MERTK
MET
MFAP3
MFAP3L
MFAP4
MFAP5
MFGE8
MFI2
MIA3
MICB
MILR1
MME
MMGT1
MMP13
MMRN1
MOXD1
MPZ
MPZL1
MPZL2
MR1
MRC1
MRC2
MRGPRF
MS4A1
MSLN
MST1R
MUC16
MUC4
MXRA5
MXRA8
MYOF
NAGPA
NCAM1
NCAM2
NCLN
NCR3
NCR3LG1
NCSTN
NEGR1
NELL1
NEO1
NEU1
NFASC
NID2
NLGN1
NLGN2
NLGN4X
NMUR1
NOMO3
NOTCH1
NOTCH2
NPC1
NPR1
NPR2
NPR3
NPTN
NPTX2
NPY1R
NRCAM
NRP1
NRP2
NT5E
NTM
NTN3
NTNG1
NTRK1
NTRK2
NTRK3
NTSR1
NUP210
NXPH4
OGN
OLFM1
OLFML2A
OLFML2B
OLFML3
OLR1
OPCML
ORM1
OSCAR
OSMR
OSTM1
P2RX7
P2RY10
P2RY11
P2RY8
P3H1
PANX1
PARM1
PCDH1
PCDH15
PCDH17
PCDH18
PCDH19
PCDH20
PCDH7
PCDH9
PCDHA10
PCDHA11
PCDHA6
PCDHGA12
PCDHGA8
PCDHGA9
PCDHGB1
PCDHGB4
PCDHGB5
PCDHGB7
PCDHGC3
PCDHGC5
PDCD1
PDCD1LG2
PDGFRA
PDGFRB
PEAR1
PECAM1
PI16
PIEZO1
PIGT
PILRA
PKHD1L1
PLA2G3
PLA2R1
PLAT
PLAU
PLAUR
PLBD1
PLTP
PLVAP
PLXDC1
PLXNA1
PLXNA2
PLXNA3
PLXNA4
PLXNB1
PLXNB2
PLXNB3
PLXNC1
PLXND1
PMEL
PMEPA1
PODXL
PODXL2
PON1
POSTN
PPAP2A
PPAP2B
PRELP
PRF1
PRG2
PRNP
PROCR
PROM1
PROM2
PRSS23
PRSS35
PTAFR
PTGDR2
PTGER2
PTGER3
PTGFRN
PTGIR
PTK7
PTPRA
PTPRB
PTPRC
PTPRD
PTPRF
PTPRG
PTPRJ
PTPRK
PTPRM
PTPRQ
PTPRS
PTPRZ1
PTTG1IP
PVR
PVRL1
PVRL2
PVRL3
PXDN
QSOX1
QSOX2
RAB5C
RAET1G
RAMP3
RECK
RELL1
RET
RHBDF2
RNF13
RNF130
RNF149
ROBO1
ROR1
ROR2
RPN1
RPN2
RTN4R
RYK
S1PR1
S1PR2
S1PR3
S1PR4
S1PR5
SCARA5
SCARB1
SCARF2
SCN2B
SCN4B
SCNN1D
SDK1
SDK2
SEL1L
SELL
SELP
SELPLG
SEMA3A
SEMA3C
SEMA4A
SEMA4B
SEMA4C
SEMA4D
SEMA4F
SEMA4G
SEMA5A
SEMA6B
SEMA7A
SERPINA1
SERPINA3
SERPINB2
SERPINE2
SERPINF1
SERPING1
SERPINI1
SEZ6L2
SGCB
SGCD
SGCE
SGCZ
SIDT2
SIGLEC1
SIGLEC10
SIGLEC12
SIGLEC5
SIGLEC6
SIGLEC7
SIGLEC9
SIRPA
SIRPB1
SIRPG
SLAMF1
SLAMF6
SLAMF7
SLC12A6
SLC12A7
SLC12A9
SLC14A1
SLC22A16
SLC23A2
SLC26A5
SLC29A1
SLC29A2
SLC29A4
SLC2A1
SLC2A4
SLC38A1
SLC39A10
SLC39A14
SLC39A6
SLC3A2
SLC44A1
SLC46A1
SLC4A7
SLC6A6
SLC7A5
SLC8A1
SLC8B1
SLC9A1
SLCO2A1
SLCO3A1
SLCO4A1
SLCO4C1
SLIT2
SLIT3
SLITRK2
SLITRK3
SLITRK4
SLITRK6
SMO
SMPDL3B
SORCS1
SORCS2
SORL1
SORT1
SPPL2A
SPPL2B
SSR1
SSR2
ST3GAL1
ST3GAL4
STAB1
STEAP4
STIM1
STS
SUCNR1
SUCO
SUSD1
SUSD2
SUSD5
SV2A
TACSTD2
TBXA2R
TCTN2
TEK
TENM1
TENM2
TF
TFPI
TFPI2
TFRC
TGFB1
TGFBR2
TGFBR3
THBD
THSD1
THSD4
THSD7A
THY1
TIE1
TIGIT
TIMP1
TLL1
TLL2
TLR1
TLR2
TLR3
TLR4
TLR9
TM2D1
TM2D3
TM9SF1
TM9SF3
TMCO3
TMED4
TMED7
TMED9
TMEFF1
TMEM132A
TMEM132E
TMEM231
TMEM25
TMEM87A
TMEM87B
TMEM8A
TMEM9
TMIGD2
TMPRSS5
TMX3
TMX4
TNC
TNFRSF11A
TNFRSF11B
TNFRSF14
TNFRSF17
TNFRSF1A
TNFRSF21
TNFRSF25
TNFRSF8
TNFRSF9
TNFSF18
TNXB
TPBG
TRHR
TRIL
TRPV2
TSHR
TTYH2
TTYH3
TXNDC15
TYR
TYRO3
TYRP1
UGT1A9
UGT8
ULBP2
ULBP3
UNC5A
UNC5B
UNC5C
VAMP5
VASN
VCAM1
VCAN
VDAC1
VEGFC
VIPR1
VNN1
VNN2
VSIG10
VSTM1
VSTM4
VTN
VWF
WNT11
WNT5A
WNT5B
YBX1
ZDHHC5
ZP4

## Sheet: PanCancer
Disease	Num. Targets
all samples	1
Lymphoma and Leukemia	4
Lymphoma and AML	19
AML and Myeloma	5
Lymphoma and pre-B-ALL	12
Lymphoma and CLL	15
Myeloma and pre-B-ALL	7
Lymphoma and T-ALL	14
T-ALL and Myeloma	5
Myeloma and CLL	19
Lymphoma and Myeloma	33
Cancer-specific high expression
GENE	all samples	Lymphoma and Leukemia	Leukemia and Myeloma	Lymphoma and AML	AML and Myeloma	Lymphoma and pre-B-ALL	Myeloma and pre-B-ALL	Lymphoma and T-ALL	T-ALL and Myeloma	Lymphoma and CLL	Myeloma and CLL	Lymphoma and Myeloma
COL5A1	210.8	Inf	24.8	15.9	0	Inf	147.8	139.1	0	28.5	0	4.6
OLFML2A	88	135.4	3.4	117.9	0	108.6	0	31.1	0	20	0	8.7
SERPING1	18.5	104.3	0	Inf	0	108.4	0	287.2	0	155.5	0	92.1
CLU	0	0	0	Inf	0	0	0	219.1	0	163.8	0	69.2
TIE1	63.8	187.7	0	247.4	11.6	52	0	21.2	0	0	0	0
PLTP	43.7	32.1	0	232	11	35.2	0	145.3	0	99.6	0	168.7
TFPI	0	29.9	0	169.7	5.2	0	0	42.9	0	0	0	0
EMILIN1	11.8	25.9	0	140.2	0	56.5	0	70.4	0	41.9	0	50.2
CALR	0	0	0	99.2	13.5	0	0	0	0	0	0	0
HSPG2	0	5	0	29.3	0	0	0	5.7	0	0	0	0
KIT	0	0	34.2	47.6	Inf	0	0	0	6.7	0	0	0
CYSLTR1	0	0	0	0	247.7	0	0	0	25.3	0	118.7	0
PIGT	10.8	0	49.4	0	153.4	0	32.8	0	98.3	0	82.7	34.6
EXTL2	0	0	0	0	88.9	0	0	0	81.7	0	3.8	23.3
AEBP1	188.5	305.7	44	0	0	Inf	62.3	162.1	0	71.1	0	0
DPEP1	185.3	0	298.9	0	0	203.6	Inf	0	35.9	0	0	0
PLVAP	165.2	260	0	203.1	0	Inf	5.2	Inf	0	Inf	0	237.7
EFNB2	59.7	138.8	0	14.8	0	Inf	56.1	100.7	0	54.6	0	23.2
GREM1	0	0	0	100.4	0	Inf	29.3	214.4	0	162.8	0	114.6
SLIT2	0	0	0	86.2	0	Inf	20.7	198.5	0	158.9	0	209.9
NID2	183.1	68.8	0	45.8	0	316.6	77.1	268.1	37.2	118.7	0	315.8
PCDH18	59.6	26.8	0	8.5	0	165	59.6	46.7	0	28.3	0	78.7
VASN	19.4	45	0	0	0	136	29.7	10.4	0	4.6	0	0
SDK1	0	0	0	0	0	120.8	0	32.9	0	13.6	0	10.9
VAMP5	34.9	60.7	0	0	0	99.7	5.1	58.5	0	16.7	0	6.9
INSR	70.8	0	268.5	0	214	9.8	Inf	0	78.3	0	16	0
BVES	10.1	0	27.6	0	37.7	0	124.2	0	66.8	0	47.1	36.3
ADAMTS15	0	0	0	0	0	0	60	0	40.6	0	26.2	0
ANTXR1	76.6	64.3	0	160.7	0	223.5	0	Inf	22.3	289.3	0	Inf
FSTL1	32.3	83.1	0	290.8	0	189.3	0	Inf	0	Inf	0	271.3
FAT1	0	0	0	80.9	0	206.5	0	Inf	0	125.5	0	80.1
MCAM	0	0	0	160.7	0	Inf	0	Inf	0	255.9	0	227.8
OGN	0	0	0	0	0	0	0	245.3	0	0	0	0
MFAP4	59	114.2	0	173.6	0	30.8	0	234.7	0	71.5	0	46.4
MFGE8	0	55.1	0	83.5	0	39.6	0	233.8	0	56.1	0	40
LGALS3BP	0	0	0	77.5	0	161.9	0	172.1	0	0	0	0
NLGN4X	0	0	0	0	0	0	231.1	14.8	Inf	0	119.5	137.4
TSHR	0	0	0	0	0	0	96.1	63.4	Inf	0	166.9	211.6
CDH2	20.9	0	29.3	0	28.5	0	33.7	28.8	245.3	0	32.4	45.3
ICAM2	0	0	0	0	0	0	0	0	195.8	0	0	0
APOD	57.4	101.5	0	81.8	0	75	0	184.7	0	Inf	34.8	113.9
SGCE	61.5	0	0	60.3	0	232.5	0	263.2	0	Inf	34.9	254.8
CD27	0	0	0	0	0	0	0	0	0	Inf	0	0
L1CAM	0	0	0	0	0	0	0	74.2	0	240.5	0	0
LRRC32	0	0	0	33.3	0	122.3	0	85.6	0	217.5	0	0
CNTNAP1	0	0	0	0	0	0	0	25.9	0	172.6	102.5	74
TNFRSF17	0	0	0	0	106.5	0	96.8	59.5	Inf	136.2	Inf	Inf
LAMA5	111.9	3.5	74.1	0	87	0	6.9	0	43.5	103.3	Inf	101.1
LRRN1	29.1	0	79.1	0	141.6	0	134	0	Inf	0	Inf	187.8
BTLA	0	0	0	0	0	0	0	0	125.3	Inf	Inf	Inf
KCNA3	0	0	0	0	0	0	0	0	0	0	Inf	0
MIA3	0	0	0	0	0	0	0	0	154.9	0	Inf	0
C11orf24	0	0	0	0	0	0	0	0	238	38	Inf	215.7
SERPINI1	0	0	0	0	0	0	0	0	160.5	0	308.8	130.2
SLCO4A1	0	0	0	0	0	0	0	0	13.2	0	88.7	14.3
RYK	0	0	0	0	0	0	0	0	0	0	45.8	0
ITGA3	0	0	0	0	0	0	0	0	0	0	6.5	0
EFEMP1	302.1	68.4	0	237.3	0	Inf	24	Inf	68.2	Inf	17.5	Inf
COL1A2	185.4	96.4	0	Inf	0	Inf	0	Inf	0	Inf	0	Inf
VCAM1	44.4	0	0	224.3	0	163.6	0	Inf	19.6	Inf	3.4	Inf
ABI3BP	208.9	65	0	Inf	0	Inf	0	Inf	13.1	Inf	0	Inf
VEGFC	135.3	14.3	0	223	0	189.2	0	Inf	57	Inf	17.3	Inf
LAMC1	85.4	0	0	0	0	298.1	253.3	51.9	30.4	187.2	148.4	Inf
ROBO1	0	0	0	143.9	0	164.6	0	Inf	0	249.1	0	Inf
CADM1	0	0	0	0	0	0	0	283.1	123.8	183.5	0	Inf
ISLR	0	0	0	261.2	0	264.4	0	Inf	0	Inf	0	Inf
DDR2	0	0	0	212.6	0	216.9	0	Inf	0	Inf	0	Inf
PPAP2A	0	0	0	0	0	0	0	241.2	77.4	175.4	44.9	Inf
MOXD1	0	0	0	0	0	0	0	50.4	Inf	35	303.4	Inf
LSAMP	0	0	0	0	0	0	0	8.6	242.9	0	186	Inf
PTPRG	60.6	0	3.7	0	32.1	12.6	102.8	16.3	137.6	46.6	194.9	287.4
EPHB1	0	0	0	0	0	0	0	72	0	38.9	0	229.9
LTBP1	0	0	0	60.3	70.9	0	0	47.5	60.2	0	6.3	205.3
TEK	0	0	0	55.1	0	22.1	0	77.8	0	50	0	144.4
SEMA3A	0	0	0	32.9	0	49	0	84.5	0	60.6	0	134
TMEM87B	0	0	0	0	0	0	0	0	12.9	0	9.7	37.9
SEZ6L2	0	0	0	0	0	0	0	0	3.4	0	0	11.4
Similar expression detected in a subset of normal blood cell types
GENE	all samples	Lymphoma and Leukemia	Leukemia and Myeloma	Lymphoma and AML	AML and Myeloma	Lymphoma and pre-B-ALL	Myeloma and pre-B-ALL	Lymphoma and T-ALL	T-ALL and Myeloma	Lymphoma and CLL	Myeloma and CLL	Lymphoma and Myeloma
CD200	234.3	92.5	176.8	0	0	27.9	89.7	0	37.7	99.3	218.1	34.5
CD19	224.9	Inf	32.7	0	0	Inf	139.7	50.3	0	Inf	7.9	9.1
CD22	121.5	Inf	0	0	0	Inf	48.6	83.1	0	Inf	0	0
TIMP1	0	0	0	Inf	82.1	0	0	83.1	0	31.5	0	84.1
LAMB2	6.9	66.1	0	289.4	0	81.9	0	140.6	0	81.8	0	37.5
CD68	0	0	0	241	0	0	0	58	0	40.4	0	0
TLR4	0	0	0	238.8	0	0	0	72.5	0	0	0	0
JAG1	0	0	0	225.2	111	0	0	9.7	0	0	0	59.4
F3	7.2	57.8	0	217	0	76.3	0	82.3	0	48.2	0	19
VNN1	0	0	0	214.6	0	41	0	56.9	0	22.4	0	19.8
IL13RA1	0	0	0	206.7	0	0	0	77.1	0	63.8	0	30.3
PLAU	0	28	0	196.7	0	39.4	0	121.5	0	60.5	0	7.3
ATP1B1	0	0	0	175.7	90.9	0	0	62.4	0	30.7	0	71.2
DSC2	0	0	0	172.5	0	9.4	0	40.1	0	18.3	0	0
LAMP2	0	0	0	101.4	272.4	0	0	0	11.4	0	0	40.5
CD79A	174	195.5	27.7	0	0	Inf	116.5	38.1	0	Inf	65.1	34.3
CD79B	242.4	153	48.1	0	0	Inf	284.3	37.8	0	265.3	98	117.7
FAM171A1	0	0	0	0	0	122	0	87.4	0	0	0	110.3
FLT1	0	0	0	0	0	112.3	4	9.6	0	5.7	0	0
CACHD1	0	10.9	0	18.9	0	40.8	0	6.1	0	0	0	0
ITGA6	0	0	0	0	0	0	144.4	0	25	0	0	0
STS	0	0	0	0	0	29.4	115.9	0	0	0	0	26.6
TLL2	0	0	0	0	0	0	53.7	0	0	0	0	0
SLITRK2	7.1	0	9.1	0	7.4	0	15.5	0	9.9	0	5.3	4.4
CR2	0	0	0	0	0	69.8	0	Inf	0	Inf	13.7	160.3
CD3G	0	0	0	0	0	0	0	314.3	0	0	0	0
CD3D	0	0	0	0	0	0	0	274.1	0	0	0	0
CD28	0	0	0	0	0	0	0	195.8	0	0	0	0
CD1C	0	0	0	0	0	0	0	153.4	0	0	0	0
ITGA2	0	0	0	24	0	6.5	0	49.7	0	14.1	0	5.6
APLP1	0	0	0	0	0	0	0	0	10.8	0	0	0
FCRL5	0	0	0	0	0	0	0	144.6	191.6	Inf	Inf	Inf
FCRL2	0	0	0	0	0	0	0	0	0	Inf	Inf	Inf
CXCR5	0	0	0	0	0	0	0	0	0	Inf	0	0
MS4A1	0	0	0	0	0	216.8	0	247.5	0	Inf	43.6	168.3
CD40	0	0	0	0	0	0	0	0	0	Inf	0	0
ADAM19	0	0	0	0	0	0	0	0	0	Inf	0	0
FCRL3	0	0	0	0	0	0	0	0	0	Inf	0	0
IL17RB	0	0	0	0	0	0	0	0	0	161.1	0	0
TLR9	6.5	0	0	3.1	0	7.1	0	50.8	0	155.9	52.7	87.2
PKHD1L1	0	0	0	0	0	0	0	44	222.4	199.7	Inf	Inf
UGT8	0	0	0	0	0	0	0	0	0	241.3	Inf	0
FCGR2B	0	0	0	0	0	0	0	0	0	0	Inf	0
LY9	0	0	0	0	0	0	0	0	0	0	314.4	0
ADRB2	0	0	0	0	142.5	0	0	0	0	0	182.9	0
CD1D	0	0	0	14.3	97.5	0	0	7.5	105.6	41.7	182.2	107.5
CASD1	0	0	0	0	0	0	0	0	0	0	116.8	0
IGSF1	0	0	0	0	0	0	0	0	0	0	21	0
CD180	0	0	0	102.3	74.2	0	0	65.8	0	205	164.7	Inf
PTPRK	0	0	0	0	0	181.6	98.4	279.5	157.1	158.7	74.6	Inf
GPNMB	0	0	0	121.7	0	91.5	0	Inf	6.8	265.9	0	Inf
ACP2	0	0	0	143.9	0	0	0	277.3	15.8	213.3	3.8	Inf
PARM1	0	0	0	0	0	0	0	133.3	248.6	103.6	200.2	Inf
LAMP3	0	0	0	0	0	0	0	158.7	283.5	0	0	Inf
PMEPA1	0	0	0	0	0	0	0	0	225.8	0	148.2	Inf
WNT5A	0	0	0	0	0	0	0	49	181.9	32	141.5	Inf
FBLN2	0	0	0	0	0	0	0	88.5	76.9	23.9	0	142.7
FAT4	25.5	0	0	8.7	0	32.1	22.5	35.5	25.2	23.5	14.8	135.9
IL6ST	0	0	0	0	0	0	0	0	0	0	0	122.7
EGFR	19.4	3.6	0	47.2	0	42.1	0	80	0	62.1	0	111
CDSN	0	0	0	0	0	0	0	0	3.1	0	0	9.9

## Sheet: Lymphoma
Disease/Clu	Annotation	Num. Targets
Lymphoma		117
2	MALT, FL, TCL and other	19
14	DLBCL	3
26	mainly DLBCL, also BL	12
46	MCL	2
50	DLBCL	42
Cancer-specific high expression
GENE	Lymphoma	Clu 2	Clu 14	Clu 26	Clu 46	Clu 50
COL3A1	Inf	Inf	263.8	227.9	57.5	61.2
LUM	Inf	Inf	252.8	218.4	46.7	61.4
COL5A2	Inf	Inf	201.9	203.2	3.9	34.3
POSTN	Inf	277.2	236.2	165.6	0	37.4
DCN	Inf	309.3	229.5	185	36.1	23
CDH5	Inf	291.2	133.3	128.2	22.4	44.4
THY1	Inf	Inf	173.8	201.5	49.1	42.6
CCDC80	Inf	194.9	120.7	36.6	0	54.9
CP	Inf	235	107.1	14.3	0	48.7
ANGPTL2	Inf	125.3	71.8	49.1	0	45.6
LAMA4	Inf	141.3	57.9	34.5	0	79.2
LIFR	Inf	283.3	27.2	0	53.6	54.6
SERPINF1	Inf	199.4	107.2	143.3	25.9	8.1
LAMB1	Inf	Inf	209.3	160.9	12.7	66.5
OLFML3	Inf	183.6	112.8	110.7	0	0
FBN1	Inf	248.3	141.6	95.1	5.3	0
CDH11	Inf	Inf	153	163.5	46.9	41.9
MXRA5	Inf	Inf	209.8	226.8	25.6	39.8
RAMP3	Inf	Inf	98.2	182.9	65.7	0
COL1A1	Inf	Inf	197.3	212.8	33.3	58.9
SLCO2A1	Inf	Inf	54.9	149.6	31.9	0
TNC	Inf	Inf	183.1	184.6	54.4	36.6
OSMR	Inf	Inf	148.8	133.6	33.2	40.2
APLNR	Inf	246.3	62	164.6	42.6	6.6
COL12A1	Inf	158.7	89.5	51.5	0	51.9
EDNRA	Inf	301	159.8	17.5	0	35.3
PDGFRA	Inf	309.9	128.5	140.1	5	32.1
VWF	Inf	172.9	93.5	167.4	28.1	0
ADRA2A	Inf	274.4	64.1	60.2	36.7	6.6
JAM2	Inf	203.8	78.1	44.8	36.6	31.3
PODXL	Inf	168.2	95.4	93	34.5	40.5
A2M	Inf	286.5	187.1	168.1	39.9	39.4
IGDCC4	Inf	248.2	49.6	87.3	35.7	17.1
OLFML2B	Inf	210.8	130.9	151	0	6.3
CLMP	Inf	234.2	70.8	0	0	57.7
NPY1R	Inf	299.7	69.9	29.1	47.2	16.9
PDGFRB	Inf	195.3	78.3	124.7	0	0
LIPG	Inf	157.2	62.4	71	0	24
CDH13	Inf	93.6	135.3	69.8	0	25.5
OLFM1	Inf	314.9	53.6	37.4	54.9	0
CMKLR1	Inf	200.6	164.3	130	0	48.3
COL6A2	Inf	263.8	122.1	209.2	49	0
COL6A3	Inf	Inf	234.7	207.6	48.6	50.1
FAP	Inf	132.5	151.7	107.7	0	19.8
FN1	Inf	196.4	157.6	120.3	0	45.6
FLRT2	Inf	224.7	54.1	0	8.7	47.1
DKK3	Inf	259.3	90.9	32.6	0	59.1
SCARA5	Inf	199.5	76	88.4	27.5	0
IGFBP3	Inf	301.3	179.5	158.3	51.2	0
TNFRSF9	Inf	146.4	92.9	98.9	31.7	39.1
TNFRSF11B	Inf	282.1	162.8	18.8	35.7	10
ASPN	Inf	154.5	108.2	35	0	64.3
BGN	Inf	115.1	59.3	140.3	0	58.7
C3	Inf	Inf	186.9	165.8	48.3	9.7
CA12	Inf	93.7	86.1	101.3	0	0
CACNA2D1	Inf	204.4	38.1	23.4	10.9	0
ADAM12	Inf	144.5	84.7	69.2	22.5	16
MFAP5	Inf	126.7	116.6	81.9	0	13.1
SEMA5A	Inf	268.5	49.5	86	50.6	0
PRELP	314.6	107.5	35	56.2	4	0
CFH	308.7	179.3	79.8	38.7	0	8.1
PCDH17	306.7	176.2	63.5	28.1	0	0
PLAT	294.4	126.2	74.1	60.1	0	0
SERPINA3	288.2	131.4	50.5	31	0	0
SERPINE2	279.8	137	47.9	27.5	28.2	12.9
COL6A1	258.7	84.1	16.3	111.7	0	13.5
FAS	250.8	155	47.2	0	0	19.8
PTPRB	242.2	134.9	37.4	0	0	47.3
TPBG	241.1	143	46.3	28.7	0	3.3
LRRC15	237.7	55.5	60.6	61.5	0	0
HLA-DQB2	230.8	86	50.5	36.6	9.3	0
MRGPRF	230.3	171.3	36	3.9	0	0
PTPRM	223.3	184.4	26	3.9	22.8	0
ABCA8	222.7	151	25	11.5	4.2	0
COL14A1	208.5	122.9	21.7	0	0	46
LOX	198	68.8	58.8	10.2	0	43
SGCB	196.6	64.7	118.1	0	0	39.1
CALCRL	164	139.7	53.9	0	0	14.7
HTR2B	154.3	82.7	32.6	0	0	63.8
HMCN1	150.1	68	20.2	26.3	0	0
ACKR3	148.4	40.8	51.8	6.1	8.1	25.9
STEAP4	142.3	104.4	12.9	4.7	0	24.2
AXL	134.5	60.3	17.8	22.2	0	6.6
CNTN3	105.1	44.6	17.8	13.7	0	0
NTM	104.2	31.5	35.9	0	0	16.5
CDH3	95.5	61.2	0	4.5	21.2	0
CDH1	81.8	78.2	0	0	15.5	17.4
SUSD5	54.6	46.1	0	0	0	0
EPHA2	53.2	43.1	0	0	5.4	0
AGTR1	25.4	24.9	0	0	0	0
IL13RA2	0	92	0	0	0	0
KITLG	54.5	69.3	4.9	0	0	0
TFPI2	0	64.8	0	0	14.8	0
FGFR2	0	46.7	0	0	0	0
SLIT3	0	39.9	0	0	0	0
CD200R1	0	38.3	0	0	0	0
PCDH7	16	23.9	0	0	0	0
S1PR3	15.6	23.2	0	0	0	0
PTPRF	8	17.7	0	0	0	0
MET	0	5.3	49	0	0	0
COL5A3	0	44.6	0	61	0	0
SEMA4A	0	0	25.2	49	0	0
PLXNA3	0	0	0	46.6	24	0
SLC29A1	0	0	0	26.1	0	0
PLXNA1	0	0	0	12.1	7.2	0
ORM1	0	0	0	9.8	0	0
SORCS1	0	15.7	0	0	17.9	0
ANGPTL1	89.3	27.4	0	0	0	108.5
KIAA1919	0	0	0	0	0	98.3
DCBLD2	11	0	0	0	0	72.4
CD46	0	0	0	0	0	70.1
LNPEP	0	0	0	0	0	65.9
ULBP3	0	0	0	0	0	63.6
FZD4	48.3	18.5	0	0	0	62.1
TNXB	0	0	0	0	0	61.5
M6PR	0	0	0	0	0	59.6
EMC1	0	0	0	0	0	59
PLA2R1	0	0	0	0	0	51.9
IL1R1	24.7	32.7	0	0	0	48
GPR39	0	0	0	0	0	42.8
NMUR1	0	0	0	0	0	39.5
NFASC	0	13.7	0	0	0	33.7
PCDHGB7	0	0	0	0	0	33.3
LAMA2	0	0	23.9	0	0	28.1
LAMA3	0	0	0	0	0	25
PTGDR2	0	0	0	0	0	22
APOB	0	0	0	0	0	21.8
SLC4A7	0	0	0	0	0	21
ITGB4	0	0	0	0	0	20.2
ADRA2C	0	0	0	0	0	18.3
MAN2B2	0	0	0	0	0	16.8
ADORA1	0	0	0	0	0	13.4
PTPRA	0	0	0	0	0	11.4
PROCR	0	0	0	0	0	11.2
PLXNB3	0	0	0	0	0	8.7
ADAM22	0	0	0	0	0	8
FAM171A2	0	0	0	0	0	6.5
NTN3	0	0	0	0	0	3.3
Similar expression detected in a subset of normal blood cell types
GENE	Lymphoma	Clu 2	Clu 14	Clu 26	Clu 46	Clu 50
PRSS23	Inf	313.8	186.5	105.8	19.8	0
SIRPG	Inf	213.9	0	0	0	0
HEG1	Inf	192.9	0	85.7	27	0
PPAP2B	Inf	162.6	113.4	61.1	24.7	0
CD80	Inf	0	162.2	126.3	0	0
CD14	306	144.3	96.9	94.5	0	0
ITGAV	276.3	164.1	108.7	0	0	7.2
CD163	269.4	93.5	84.7	76.6	0	9.1
SIGLEC1	235.5	100.4	24.8	75.8	0	4.2
COL11A1	218.6	0	79.8	46.8	0	0
MYOF	190.2	112.2	56.3	37.4	0	0
PDCD1LG2	186.8	77.2	33.4	11.3	0	57.4
NRP1	174.4	116	50.4	0	0	23.3
CD274	153	87.3	20.1	14.1	0	0
CPM	140.7	68.6	53.8	0	0	0
CHL1	135.1	22.8	11	9.9	70.6	18.2
PTGFRN	134.4	103.5	10.1	24.9	0	0
F2R	126.8	88.1	79.6	0	0	0
IFI30	100.8	15.8	48	60.1	0	0
CSF2RB	83.5	24.9	18.7	17.2	0	0
COL6A6	73.7	66.2	0	0	0	0
LAMC2	69	45.9	0	3.1	4.3	11.4
ICAM1	65	26.6	6.2	35.1	0	0
ACHE	48.7	0	0	35.1	6.5	0
GFRA1	24.6	23.7	0	0	0	0
SLC46A1	16	15	0	3.3	0	0
CPZ	3.9	0	0	0	0	0
FGL2	0	134.2	0	0	0	0
CD4	0	127.5	0	78.7	0	0
THBD	52.7	103.9	0	0	0	0
PLXNC1	0	68.6	45.7	0	0	0
IL1R2	17.2	51	0	0	0	0
IL2RG	0	40	0	22.5	0	0
TLR3	0	14.9	0	0	0	0
NTRK2	0	11.8	0	0	0	0
SCN4B	0	11.6	0	0	0	0
LAMB3	0	5.4	0	0	0	0
CCDC126	0	0	61.9	0	0	0
SEMA3C	0	0	30.6	0	0	0
KIR2DL3	0	0	0	54.6	0	0
RAB5C	0	0	0	12.7	0	0
UNC5B	7	0	0	11.7	0	0
MST1R	0	0	0	10.1	0	0
SUSD2	0	0	0	5.5	0	0
HLA-DRA	0	0	0	3.4	0	0
PTPRJ	0	0	0	0	39.1	0
NRP2	5.1	0	0	0	0	43.8
SIGLEC10	0	0	0	0	28.2	28.5
S1PR2	0	0	0	0	0	26
SLC8A1	0	0	0	0	0	22
MFAP3	0	0	0	0	0	21
DNER	0	0	0	0	0	15.6
PLXNA4	0	0	0	0	0	14.7
NRCAM	0	0	0	0	0	13.9
PTPRS	0	0	0	0	0	11.7
PTPRC	0	0	0	0	0	6.7
COL26A1	0	0	0	0	0	3.5

## Sheet: MM
Disease/Clu	Num. Targets
Myeloma	38
20	7
49	44
Cancer-specific high expression
GENE	Myeloma	Clu 20	Clu 49
ATRAID	Inf	92.3	Inf
CNTN1	Inf	101.7	174.4
IL5RA	Inf	92.1	253.4
ITGA8	Inf	52.9	290.9
TM9SF1	Inf	3.9	Inf
LMAN2	Inf	3.2	Inf
SEL1L	Inf	206.2	Inf
SSR1	Inf	50.4	259
BTD	Inf	0	Inf
CRELD2	Inf	152.7	279
TXNDC15	Inf	190.9	Inf
ITFG1	297.1	32.7	262.4
FAM174A	293.2	25	244.5
SMPDL3B	270.7	82.3	152.1
SLC44A1	253	73.1	165.9
MFAP3L	251.9	72.7	148.2
TYRP1	250.8	29.5	202.6
TMED9	221.5	27.1	179.4
WNT5B	219.6	28.1	195.3
ROR2	214	103.5	80.4
ANO5	207.5	71.7	110.8
RPN1	192.9	14.1	170.2
MERTK	175.1	53.5	108
CALU	167.5	17.5	164
CANX	154.9	28	134.1
SLC39A14	99.3	58.9	30.9
RPN2	85.8	14.4	53.2
ALPP	60.4	0	49.7
PODXL2	11.6	0	6.6
LRRC4B	4.3	0	0
BST2	3.1	0	0
NEO1	0	57.4	0
ITIH2	22	41.9	0
TYR	28.4	41	0
PLA2G3	9.6	19.5	0
TMED4	269.7	0	Inf
SSR2	172.1	0	209.1
C6orf120	119.3	0	141.5
INHBE	0	0	122.4
SLC12A9	68.8	0	119.4
CRTAP	65	0	91.2
NEU1	55.4	0	89.5
TMEM25	66.2	0	81.5
TMED7	47.9	0	64.9
SLC3A2	0	0	64.1
NCLN	43.9	0	63.7
CD59	52.4	0	62.9
CLDN12	16	0	50
MMGT1	31.3	0	49.6
CADM4	0	0	42.9
LRP11	21.8	0	39.8
TMEM9	20.4	0	30.1
TF	0	0	24.3
TMEM231	10.1	0	23.5
FCGR3B	0	0	23.3
FGFR3	0	0	22.1
C4BPB	14.4	0	21.7
BSG	4.5	0	18.9
WNT11	9.2	0	18.5
SLC39A6	0	0	15.4
HHLA2	0	0	13.2
C6orf25	0	0	12.6
PCDHGB5	3.1	0	9.6
DAG1	0	0	9
PVRL1	0	0	8
C1QTNF2	0	0	7.7
PCDHA10	0	0	5.1
CHGA	0	0	3.9
Similar expression detected in a subset of normal blood cell types
GENE	Myeloma	Clu 20	Clu 49
IFNAR1	Inf	135.6	176.5
SLAMF7	Inf	0	272.9
NCAM1	287.3	68.8	196.8
PECAM1	147.2	59.1	77.3
DCBLD1	139.5	0	106.4
CDH17	50.9	31.7	0
NCSTN	41	22.5	11.4
PCDH19	20.2	30.4	0
IGSF8	0	29.9	0
SLITRK3	0	20.9	0
MR1	0	0	272.3
OSTM1	0	0	131.6
PVRL3	0	0	102.4
BCHE	0	0	61.7
GNPTG	33.5	0	37.6
EVI2A	0	0	31.6
CPQ	0	0	14.7
MICB	0	0	13.1
IFNAR2	6.2	0	8.4
PCDHA6	0	0	5
CSPG5	0	0	4.3

## Sheet: Leukemia
Disease	Num. Targets
Leukemia	3
AML and pre-B-ALL	16
AML and T-ALL	2
AML and CLL	2
T-ALL and pre-B-ALL	14
pre-B-ALL and CLL	9
T-ALL and CLL	2
Cancer-specific high expression
GENE	Leukemia	AML and pre-B-ALL	AML and T-ALL	AML and CLL	T-ALL and pre-B-ALL	pre-B-ALL and CLL	T-ALL and CLL
SV2A	258.6	199.9	165.3	0	227.7	17.2	0
HNRNPK	35.5	12.4	14.2	21.4	4.2	9.1	15.5
COL5A1	110.5	182.8	0	0	Inf	237.3	0
FLT3	Inf	Inf	312.5	241.7	173.6	129.7	0
NEGR1	Inf	Inf	94.2	34.6	146.7	69.7	0
SLC22A16	Inf	Inf	301.5	80.9	252	60.7	0
PROM1	281.4	Inf	150	74.2	55.9	15.1	0
CD34	282.3	306.4	65.8	16.2	136.7	59.2	0
RTN4R	102.3	144.7	43.5	25.8	33.9	0	0
CEACAM8	60.8	72.2	11	0	53.1	0	0
NPTX2	0	0	184.9	0	0	0	0
CNNM2	6.2	0	18.6	0	0	0	0
AEBP1	125.6	50.4	0	0	Inf	228.8	72.8
DPEP1	146.9	197	0	0	Inf	299.3	0
PXDN	157.1	256	0	0	Inf	242	0
DCHS1	201.7	195.5	30.7	0	Inf	123.5	0
HHIP	144.3	24.3	49.4	0	Inf	34.1	78.9
PTPRD	0	0	0	0	180.6	0	0
EFNA1	75.6	94.4	0	0	170.3	77.1	0
CDH4	0	0	0	0	169.1	0	0
TNFRSF21	35.1	36.4	7.1	0	141.6	11.3	0
PLXNB1	82.9	78.5	19.3	0	94.4	32.4	0
IL17D	5	16	0	0	48.9	14.4	0
SPPL2B	10.1	9.5	0	0	22.7	14.3	0
SDK2	Inf	154.1	0	0	253.9	Inf	85.9
PCDH9	0	0	0	0	207.1	Inf	139.3
TBXA2R	113.3	88.2	0	31.1	46.3	129.4	0
Similar expression detected in a subset of normal blood cell types
GENE	Leukemia	AML and pre-B-ALL	AML and T-ALL	AML and CLL	T-ALL and pre-B-ALL	pre-B-ALL and CLL	T-ALL and CLL
PLXND1	128	121.2	112.2	34.9	23	0	0
CD19	120.9	61.2	0	0	281.2	Inf	64.4
CD22	69.2	30.1	0	0	206.8	Inf	53.1
PLXNB2	135	Inf	61.6	0	67	0	0
ITGA5	0	Inf	182.9	0	40.2	0	0
LAIR1	0	312.3	186.4	0	85.1	0	0
LTB4R	115.4	236.1	82.9	45.3	28.4	8.5	0
THSD7A	82.6	143	0	0	76	52.3	0
IL3RA	40.1	98.2	7.7	0	32	0	0
PVRL2	10.3	57.4	9.9	0	3.1	0	0
EPHB3	0	40	0	0	0	0	0
GALNT1	0	18.1	0	0	0	0	0
SLC12A6	0	0	0	163.9	0	82.6	21.4
TGFB1	0	0	0	101	0	0	0
CD109	0	108.7	0	0	239.6	0	0
SLC7A5	0	17.8	0	0	67	0	0
CD79A	48.3	4.6	0	0	136.5	Inf	90.4
CD79B	22.6	11.6	0	0	169.7	Inf	22.4
IGHM	59.1	24.3	0	0	95.7	Inf	46.1
QSOX2	0	0	0	0	15.5	Inf	206.7
ICOSLG	0	0	0	0	0	159	0
FAM174B	0	0	0	0	0	18.4	0
CD5	0	0	0	0	0	0	Inf
KIAA0922	0	0	0	0	80.6	183	187.5

## Sheet: AML
Disease/Clu	Annotation	Num. Targets					Clu	Annotation
AML		45					8	CEBPA mut
5	Normal Karyotype, NPM mutated	2					9	MDS
6	Normal Karyotype, NPM mutated	34					16	MDS
7	CBF-MYH and complex	2					17	PML-RARA
15	RUNX1-RUNT1X	3					32	na
Cancer-specific high expression
GENE	AML	Clu 5	Clu 6	Clu 7	Clu 15	Clu 17	Clu 19	Clu 32
IL1RAP	Inf	106	94.5	62.8	34.3	24.7	0	0
ANGPT1	Inf	153.9	57.6	113.1	4.7	0	0	9.9
CD33	Inf	121.6	162.5	55.6	0	34	27.6	0
SLITRK4	Inf	113.7	154.9	0	0	54.9	29.6	7.3
NPR3	305.6	73.4	16.5	211.1	53.4	0	0	9.7
STAB1	292.9	52.5	138	74.8	0	53.3	0	0
F13A1	159.9	18.9	61.7	42.3	10.2	15.7	0	0
EMB	137	20.5	91.1	21.2	0	0	11.5	0
MMRN1	131.4	45.1	5.5	80.8	0	0	3.9	3.6
VSTM1	130.2	0	52.3	48.9	37.9	38.9	0	0
FBN2	80.8	0	56.7	0	9.2	38	0	0
EPDR1	76.8	40.6	0	16.5	0	11.2	0	7.4
CAPNS1	73.2	6.8	10.4	27.7	6	3.2	0	0
ST3GAL4	71.1	64.5	0	0	0	41.8	0	0
ADAM15	66.7	0	28.7	17.7	6.3	0	0	0
PRG2	59.9	5.3	9.5	9.5	6.8	11.8	0	0
BMP1	50.3	33.1	0	0	0	21	3.5	0
LEPR	32.9	29	0	0	0	0	0	6.6
RET	24.6	0	21.2	0	0	0	20.7	0
ATP6V0A2	0	23.5	0	15.5	0	0	0	9
C10orf54	138.3	0	241.4	0	0	0	4.2	0
GRN	73.5	0	165.2	0	0	3.6	11.8	0
SIRPB1	0	0	164.7	0	0	0	14.2	0
LILRA1	0	0	154.3	0	0	0	0	0
VCAN	90.1	0	130.5	47.7	0	0	0	0
ITGA7	74.2	0	102.7	0	0	0	59.5	0
LRRC25	0	0	94.9	0	0	0	0	0
LILRA5	0	0	83.5	0	0	0	0	0
SORCS2	0	0	31.2	0	0	0	0	4.5
HP	0	0	8.1	0	0	0	0	0
ITGA9	70.5	0	0	73.9	51.4	0	0	0
PEAR1	6.5	0	0	55.7	15.1	0	0	0
SIGLEC6	0	0	0	0	18.3	0	0	6.3
PTGIR	0	0	0	0	7.6	0	0	0
LOXL4	0	0	0	0	0	96.2	0	0
COL2A1	0	0	0	0	0	76.3	0	0
MRC2	9.7	0	0	0	0	68.8	0	0
EPCAM	11.4	8.7	0	0	7.6	21.4	0	0
PTGER3	0	0	0	0	0	20.3	0	0
AGRN	0	0	0	0	0	17.2	0	0
FGFRL1	0	0	0	0	0	16.6	0	0
SORL1	0	0	0	0	11.9	16.4	0	0
IGLON5	0	0	0	0	0	15.9	0	0
TMX4	0	0	0	0	0	10.2	0	0
MSLN	0	0	0	0	24.2	0	53.7	0
UNC5C	0	0	0	0	0	0	23.1	0
TMX3	0	0	0	0	0	0	0	54.2
TM2D3	0	0	0	0	0	0	0	42.9
ABCC1	17	0	0	0	0	0	0	37.2
SLC39A10	0	0	0	0	0	0	0	26.7
TM2D1	0	0	0	0	0	0	0	23.2
IL1RL2	0	0	0	0	0	0	0	23
SGCZ	0	0	0	0	0	0	0	22.8
FAT3	0	0	0	0	0	0	0	17.4
BDNF	0	0	0	0	0	0	0	16.9
IL17RD	0	0	0	0	0	0	0	16.2
TRHR	0	0	0	0	0	0	0	15.8
TMEM132E	0	0	0	0	0	0	0	12.1
TMEM132A	0	0	0	0	0	0	0	10.4
OPCML	0	0	0	0	0	0	0	9.9
PCDH15	0	0	0	0	0	0	0	9.3
PRSS35	0	0	0	0	0	0	0	8.6
SLC29A2	0	0	0	0	0	0	0	8.3
LMAN2L	0	0	0	0	0	0	0	8.1
KIRREL	0	0	0	0	0	0	0	7.8
NTSR1	0	0	0	0	0	0	0	7.5
FREM2	0	0	0	0	0	0	0	7.1
APOH	0	0	0	0	0	0	0	5.8
LRP1B	0	0	0	0	0	0	0	5.3
GPC1	0	0	0	0	0	0	0	5.2
ITGB6	0	0	0	0	0	0	0	5.1
CADM2	0	0	0	0	0	0	0	3.2
Similar expression detected in a subset of normal blood cell types
GENE	AML	Clu 5	Clu 6	Clu 7	Clu 15	Clu 17	Clu 19	Clu 32
LTBR	Inf	75.5	151.1	61.4	6.9	23.9	14.5	0
CLEC12A	Inf	60.1	123.9	75.1	12.9	14.6	12.2	0
CD244	Inf	116.6	55.4	87.2	28.8	24.4	0	0
BACE1	316.8	129.7	64.8	55.2	12.7	27	0	0
TLR2	292.5	41.3	150.4	53.8	16.6	8.5	11.6	0
EMILIN2	279.5	9.6	161.1	49.7	7.8	55.6	6.2	0
SUCNR1	231.2	102.2	47.8	40.1	9.5	19.9	0	0
RNF130	211.7	11.9	43.9	70.3	27	32.8	3.1	0
ANPEP	208	38.1	48.5	74.1	0	33.9	0	3.2
DMXL2	198.1	76.2	176	0	0	39.4	0	0
BST1	198	6.5	157	45.1	5.2	0	12.8	0
OSCAR	186.6	0	125	26.9	0	44.7	0	0
CREG1	175.7	93.1	85.4	13.2	0	0	0	0
ADAMTSL4	171.5	16.8	80.1	20.1	25.8	8.8	0	0
ACTN1	162.6	42.5	73.4	21.4	0	26	6	0
APLP2	155	0	127.5	31.5	0	0	17.7	0
CPD	148.7	36.4	102	0	0	6	13.8	0
PLAUR	145	22.3	106.2	6.3	0	25.4	12.4	0
TMCO3	140.4	68.3	15.5	6.4	4.1	13.5	0	15
QSOX1	130.4	19.2	116.5	0	0	21.6	7.7	5.7
SERPINB2	118.1	5.5	104.2	28.3	0	0	7.7	0
CD44	99.8	0	23	26.8	0	4.5	0	0
CLEC5A	89.2	0	52.6	22.6	20.6	26.2	0	0
ITGA2B	56.7	31.2	18.8	5.2	0	0	0	0
F11R	48.7	38	0	0	9	3.5	0	17.3
TNFRSF1A	32.5	0	8	4	5.3	0	0	10.3
CD164	0	6.6	0	0	0	0	0	3.7
PILRA	0	0	176.6	0	0	0	0	0
PTAFR	0	0	149	0	0	0	14	0
ITGB2	0	0	131.2	0	0	0	0	0
ITGAX	0	0	123	0	0	0	0	0
IL17RA	120.1	0	120.6	42.5	0	35.3	23.5	0
SERPINA1	0	0	118.3	0	0	0	0	0
PTGER2	0	0	104	0	0	0	0	0
SORT1	0	0	84.8	0	0	0	0	0
SLCO3A1	0	0	79.9	0	0	0	0	0
CYBB	0	0	75.9	0	0	0	0	0
PLBD1	0	0	72.9	0	0	0	0	0
CSF2RA	27.7	0	71.2	6.1	0	0	0	0
CD86	0	0	68.9	0	0	0	0	0
IFNGR1	0	0	53.3	0	0	0	0	0
VNN2	0	0	48.5	0	0	0	0	0
FCAR	16.9	0	48.4	6.2	0	0	0	0
CTSD	0	0	44.5	0	0	0	0	0
SLCO4C1	0	0	42.5	0	0	0	0	0
CD101	0	0	35.1	0	0	0	0	0
F5	0	0	26.2	0	0	0	0	0
LRP1	0	0	24.7	0	0	0	0	0
ITPRIP	0	0	23.1	0	0	0	0	0
SIGLEC5	0	0	13.7	0	0	0	0	0
EPHA1	0	0	8.5	0	0	0	0	0
CACNA2D2	0	0	0	0	36.9	0	0	0
CD96	0	0	0	0	0	39.4	0	0
SLC6A6	0	0	0	0	0	0	0	12
CDCP1	0	0	0	0	0	0	0	11.1
LRP2	0	0	0	0	0	0	0	8.7
KNG1	0	0	0	0	0	0	0	6.8

## Sheet: pre-B-ALL
Disease/Clu	Annotation	Num. Targets		Genes in bold shown in Fig.
pre-B-ALL		21		See Enriched CancerSpecific list for all high ranked candidates in pre-B-ALL
21	BCR-ABL and hyperdiploid	5
27	other	8
28	TCF3-PBX1	9
29	MLL	4
30	other	2
31	other	5
33	ETV6-RUNX1	6
Cancer-specific high expression
GENE	pre-B-ALL	Clu 21	Clu 27	Clu 28	Clu 29	Clu 30	Clu 31	Clu 33
CLEC14A	Inf	227.1	0	19.6	129.4	33.5	28.3	21.6
VSIG10	Inf	280.2	21.1	62.9	75.1	3.9	70.7	84.8
CELSR2	Inf	70.5	0	65	52.3	42.3	9.5	80.2
MME	Inf	196.4	24.1	50.1	0	28.4	69.4	94.9
NPR1	Inf	293.6	21.2	0	3.2	33.9	48.9	103.4
CRIM1	Inf	144.5	0	0	0	0	47.6	58.7
GPM6B	301.8	82.9	0	40.3	142.6	4.2	41.9	0
ELFN2	294	183	7.8	18	0	0	43.6	36.4
FLT4	274.2	119	16.1	0	7.9	37.4	55.2	6.1
APCDD1	269.6	118.6	0	43.1	4.3	34.8	0	42
GPR176	197.1	0	10	63.6	30	9.2	26.1	0
LRP5	164.9	120	0	14.9	0	7	0	23.2
RELL1	117.1	34.7	5.1	0	14.9	11	0	0
EFNB1	109.6	83.7	0	0	0	0	5.9	11.4
LTF	48.1	44.8	4.9	0	0	0	0	6
EPHB4	32.4	10.7	0	0	0	5.4	0	3.5
CEACAM6	90.4	135.7	0	0	0	0	0	0
ULBP2	0	0	31.2	0	0	0	0	0
CDON	0	0	22.1	0	0	0	0	0
SCN2B	0	0	6.3	0	0	0	0	0
BTN2A1	0	0	6.3	0	0	0	0	0
AGTR2	0	0	6.2	0	0	0	0	0
LRRN4CL	0	0	3.6	0	0	0	0	0
AMBP	0	0	0	55.3	0	0	0	0
MFI2	0	0	0	46.5	0	0	0	0
EPHA3	0	0	0	35.2	0	0	0	0
NLGN1	0	0	0	29.8	0	0	0	0
TRIL	0	0	0	16.1	0	0	0	0
ATP1A3	0	0	0	11	0	0	0	0
FLRT1	0	0	0	8.5	0	0	0	0
CSPG4	0	0	0	0	137.2	0	0	0
PCDHGC3	0	0	0	0	33.4	0	0	0
ESAM	0	0	0	41.7	0	51	0	0
IGF1R	0	0	0	0	0	27.1	0	12.8
NELL1	0	0	0	31.2	0	0	37.4	0
CDH19	0	0	0	0	0	0	24.5	0
NCAM2	0	0	0	0	0	0	19.7	0
NTNG1	26.2	0	0	0	0	0	0	100.4
SCARB1	39.6	12.1	0	0	0	7.5	0	63.9
RECK	0	22.8	0	0	0	0	0	44.9
C12orf49	0	0	0	0	0	0	0	39.4
NTRK1	0	0	0	0	0	0	0	23.6
Similar expression detected in a subset of normal blood cell types
GENE	pre-B-ALL	Clu 21	Clu 27	Clu 28	Clu 29	Clu 30	Clu 31	Clu 33
NT5E	Inf	185.7	18.1	18.9	0	0	56	67.3
MILR1	224	100	0	0	36.5	0	37	43.4
SLC12A7	171.2	61.6	15.2	0	32.4	0	31.7	0
ELFN1	48.7	0	0	0	0	0	0	12.3
TMEM87A	47.7	0	4.5	0	0	12.7	25	0
MUC4	0	81.5	0	0	0	0	0	0
ENG	37.3	43.7	0	0	0	0	25.6	0
LRFN1	0	39.4	0	0	0	0	0	0
TTYH2	0	16	0	0	0	0	0	0
GPR107	0	0	25.1	0	0	0	0	0
THSD4	0	0	3.8	0	0	0	0	0
JAG2	0	0	7.5	12.7	0	0	0	0
CD58	0	0	0	7.9	0	0	0	0
ADAM10	0	0	0	0	25.2	0	0	0
PRNP	0	0	0	0	4	0	0	0
ERBB2	0	0	0	0	0	0	9.9	0
DYNC2H1	0	0	0	0	0	0	6.3	0
EFNA4	0	0	0	0	0	0	0	7.3
Similar expression detected in a subset of normal blood cell types

## Sheet: T-ALL
Disease/Clu	Num. Targets
T-ALL	23
Cancer-specific high expression
GENE	Target of approved drug	Target of drug in trial	T-ALL
CHRNA3	FALSE	FALSE	294.7
CD1B	FALSE	FALSE	246.2
CD7	FALSE	FALSE	222.7
ASIC1	FALSE	FALSE	201.3
PTK7	FALSE	FALSE	190.2
FGFR1	FALSE	FALSE	175.9
TENM1	FALSE	FALSE	136.5
ACVR2B	FALSE	FALSE	127.1
LRP4	FALSE	FALSE	116
GPR174	FALSE	FALSE	111.3
JAM3	FALSE	FALSE	89
DSG2	FALSE	FALSE	69.5
ITGAE	FALSE	FALSE	67.9
SLC29A4	FALSE	FALSE	63.3
KRT1	FALSE	FALSE	56.2
CXADR	FALSE	FALSE	48.7
LDLR	FALSE	FALSE	48
PON1	FALSE	FALSE	41.2
NOTCH1	FALSE	FALSE	35.2
CD47	FALSE	FALSE	10.5
Similar expression detected in a subset of normal blood cell types
GENE	Target of approved drug	Target of drug in trial	T-ALL
TMIGD2	FALSE	FALSE	204.9
LRP12	FALSE	FALSE	126.8
CD6	FALSE	FALSE	62.2
Similar expression detected in a subset of normal blood cell types

## Sheet: CLL
Disease/Clu	Num. Targets
CLL	29
40	7
42	8
Cancer-specific high expression
GENE	CLL	Clu 40	Clu 42
CELSR1	Inf	0	0
ROR1	Inf	0	0
SEMA4B	Inf	0	0
CCR7	Inf	0	0
FCER2	Inf	0	0
BMPR2	Inf	0	0
CYTH1	296.9	0	0
CNTNAP2	273.1	0	0
ANO9	265.3	0	0
IL4R	261.9	0	0
SLC23A2	257.1	0	0
P2RY10	222.3	0	0
VIPR1	207.2	0	0
IGSF3	207.2	0	0
AMIGO2	204.5	0	0
CNR2	200.3	0	0
TNFRSF14	147.8	0	0
SELP	127.2	0	0
CELSR3	101.3	0	0
CD55	64.4	0	0
ABCA7	41.9	0	0
GRIK3	37.4	0	0
NXPH4	0	34.1	0
ICAM3	0	15.2	0
SLAMF6	0	0	127.4
SIDT2	0	0	72.5
SELL	0	0	55.1
CEACAM1	0	0	32.7
Similar expression detected in a subset of normal blood cell types
GENE	CLL	Clu 40	Clu 42
IL10RA	254	0	0
HLA-DPB1	217.8	0	0
SEMA4F	129.2	0	0
SLC38A1	119.2	0	0
FKRP	79.6	0	0
CNNM4	43.6	0	0
SEMA4G	3.8	0	0
NCR3	0	177.3	0
CD83	0	152	0
FCGRT	0	40.9	0
CXCL16	0	18.7	0
TLR1	0	15.3	0
LPAR5	0	0	143.1
CNNM3	0	0	100.1
LTBP3	0	0	28.9
SLC14A1	0	0	23
IL10RA	254	0	0
HLA-DPB1	217.8	0	0
SEMA4F	129.2	0	0
SLC38A1	119.2	0	0
FKRP	79.6	0	0
CNNM4	43.6	0	0
SEMA4G	3.8	0	0
NCR3	0	177.3	0
CD83	0	152	0
FCGRT	0	40.9	0
CXCL16	0	18.7	0
TLR1	0	15.3	0
LPAR5	0	0	143.1
CNNM3	0	0	100.1
LTBP3	0	0	28.9
SLC14A1	0	0	23
Similar expression detected in a subset of normal blood cell types

[truncated: 2 more sheets: Enriched CancerSpecific, Enriched HighNormalExprs]
