# Supplementary material for: Hemap: An Interactive Online Resource for Characterizing Molecular Phenotypes across Hematologic Malignancies
Source: Oxford University Press journal article supplement (doi:10.1158/0008-5472.can-18-2970), 2019-04-02
Supplement: 00085472can182970-sup-209119_2_supp_5419308_p6vkkn.xlsx [file 00085472can182970-sup-209119_2_supp_5419308_p6vkkn.xlsx]

## Sheet: Table S5
Table S5. Top 5 pathways per cluster.
Pathway	Category	Spearman´s Rho	adj.P-value (correlation)	adj.P-value (hgt.test)
HISTONE_MODIFICATIONS-WIKIPW	Cancer_Leukemia	00:54:00	292.193557357304	Inf
COREGULATION_OF_ANDROGEN_RECEPTOR_ACTIVITY-NCI_NATURE_V4_PID	Cancer_Leukemia	00:49:00	292.193557357304	287.625355633237
METASTATIC_BRAIN_TUMOR-WIKIPW	Cancer_Leukemia	00:04:00	292.193557357304	273.26413843159
MTOR_PATHWAY-BIOCARTA_MsigDB_c2	Cancer_Leukemia	00:51:00	292.193557357304	268.197922162706
SIGNALING_EVENTS_MEDIATED_BY_HDAC_CLASS_I-NCI_NATURE_V4_PID	Cancer_Leukemia	00:55:00	292.193557357304	258.437682501631
HEMATOPOIETIC_STEM_CELL_DIFFERENTIATION-WIKIPW	AML	00:35:00	253.193557357304	184.017466098248
PENTOSE_PHOSPHATE_PATHWAY-WIKIPW	AML	00:35:00	249.093557357304	163.114376111256
RENIN_ANGIOTENSIN_SYSTEM-KEGG_MsigDB_c2	AML	00:35:00	251.893557357304	162.675043417426
IL8_AND_CXCR1_MEDIATED_SIGNALING_EVENTS-NCI_NATURE_V4_PID	AML	00:34:00	234.093557357304	162.312743765023
C_MYB_TRANSCRIPTION_FACTOR_NETWORK-NCI_NATURE_V4_PID	AML	00:36:00	259.793557357304	156.989437374648
METASTATIC_BRAIN_TUMOR-WIKIPW	5	00:22:00	90.9935573573038	70.1935573573038
LEPTIN_PATHWAY-BIOCARTA_MsigDB_c2	5	00:02:00	76.1935573573038	39.1521646721456
RNA_INTERFERENCE-WIKIPW	5	00:15:00	38.2935573573038	34.8133461155922
HEMATOPOIETIC_STEM_CELL_DIFFERENTIATION-WIKIPW	5	00:16:00	48.2935573573038	31.3362248608726
RENIN_ANGIOTENSIN_SYSTEM-KEGG_MsigDB_c2	5	00:18:00	62.6935573573038	30.1521646721456
MONOCYTE_PATHWAY-BIOCARTA_MsigDB_c2	6	00:26:00	131.393557357304	138.114376111256
LYSOSOME-KEGG_MsigDB_c2	6	00:25:00	119.193557357304	134.989437374648
IL8_AND_CXCR2_MEDIATED_SIGNALING_EVENTS-NCI_NATURE_V4_PID	6	00:25:00	125.293557357304	131.851134676482
OTHER_GLYCAN_DEGRADATION-KEGG_MsigDB_c2	6	00:26:00	130.393557357304	129.312743765023
GRANULOCYTES_PATHWAY-BIOCARTA_MsigDB_c2	6	00:26:00	128.493557357304	126.540344843528
EICOSANOID_LIGAND_BINDING_RECEPTORS-REACTOME_MsigDB_c2	7	00:24:00	108.793557357304	91.2850723384252
C_MYB_TRANSCRIPTION_FACTOR_NETWORK-NCI_NATURE_V4_PID	7	00:22:00	91.3935573573038	79.079614004997
PROSTANOID_LIGAND_RECEPTORS-REACTOME_MsigDB_c2	7	00:22:00	93.9935573573038	73.2904673703119
HEMATOPOIETIC_STEM_CELL_DIFFERENTIATION-WIKIPW	7	00:21:00	87.2935573573038	71.079614004997
IL8_AND_CXCR2_MEDIATED_SIGNALING_EVENTS-NCI_NATURE_V4_PID	7	00:02:00	74.5935573573038	65.7463993259616
PROSTANOID_LIGAND_RECEPTORS-REACTOME_MsigDB_c2	15	00:12:00	25.2935573573038	23.3422990085848
SIGNALING_BY_FGFR1_FUSION_MUTANTS-REACTOME_MsigDB_c2	15	00:12:00	21.5935573573038	22.8318295212862
SIGNALING_BY_FGFR1_MUTANTS-REACTOME_MsigDB_c2	15	00:11:00	17.9935573573038	19.3302344971834
EICOSANOID_LIGAND_BINDING_RECEPTORS-REACTOME_MsigDB_c2	15	00:11:00	16.1935573573038	13.8713380625699
ACTIVATION_OF_CHAPERONE_GENES_BY_ATF6_ALPHA-REACTOME_MsigDB_c2	17	00:15:00	38.8935573573038	41.5123161199283
ELEVATION_OF_CYTOSOLIC_CA2_LEVELS-REACTOME_MsigDB_c2	17	00:14:00	34.3935573573038	39.675043417426
ACTIVATION_OF_CHAPERONES_BY_ATF6_ALPHA-REACTOME_MsigDB_c2	17	00:14:00	34.2935573573038	34.8925273616399
RENIN_ANGIOTENSIN_SYSTEM-KEGG_MsigDB_c2	17	00:13:00	30.0935573573038	31.3484593172896
CALNEXIN_CALRETICULIN_CYCLE-REACTOME_MsigDB_c2	17	00:13:00	26.2935573573038	22.7311593594049
LIMONENE_AND_PINENE_DEGRADATION-KEGG_MsigDB_c2	19	00:12:00	21.2935573573038	23.5033612772753
PENTOSE_PHOSPHATE_PATHWAY-KEGG_MsigDB_c2	19	00:11:00	18.8935573573038	17.7463993259616
AFLATOXIN_B1_METABOLISM-WIKIPW	19	00:11:00	17.0935573573038	9.43768250163135
CTCF_PATHWAY-BIOCARTA_MsigDB_c2	pre-B-ALL	00:43:00	292.193557357304	Inf
PGC1A_PATHWAY-BIOCARTA_MsigDB_c2	pre-B-ALL	00:43:00	292.193557357304	Inf
MEIOTIC_SYNAPSIS-REACTOME_MsigDB_c2	pre-B-ALL	00:44:00	292.193557357304	Inf
HISTONE_MODIFICATIONS-WIKIPW	pre-B-ALL	00:47:00	292.193557357304	Inf
HDAC_PATHWAY-BIOCARTA_MsigDB_c2	pre-B-ALL	00:41:00	292.193557357304	297.477554013669
MEIOTIC_SYNAPSIS-REACTOME_MsigDB_c2	21	00:27:00	143.993557357304	148.662078440262
PGC1A_PATHWAY-BIOCARTA_MsigDB_c2	21	00:27:00	139.693557357304	143.851134676482
HDAC_PATHWAY-BIOCARTA_MsigDB_c2	21	00:25:00	126.293557357304	138.795617348632
HISTONE_MODIFICATIONS-WIKIPW	21	00:27:00	141.793557357304	125.312743765023
CTCF_PATHWAY-BIOCARTA_MsigDB_c2	21	00:24:00	112.593557357304	115.914803756351
IRAK1_RECRUITS_IKK_COMPLEX-REACTOME_MsigDB_c2	27	00:12:00	25.0935573573038	29.9631084359256
CIRCADIAN_RHYTHM_PATHWAY-NCI_NATURE_V4_PID	27	00:11:00	17.9935573573038	18.2023312816113
MRNA_PROCESSING-WIKIPW	27	00:11:00	16.7935573573038	17.3302344971834
TAMOXIFEN_METABOLISM-WIKIPW	27	00:11:00	18.3935573573038	13.2441673506589
DEGRADATION_OF_BETA_CATENIN-NCI_NATURE_V4_PID	27	00:11:00	17.8935573573038	13.1935573573038
LOSS_OF_NLP_FROM_MITOTIC_CENTROSOMES-REACTOME_MsigDB_c2	28	00:13:00	28.9935573573038	28.2441673506589
WNT_SIGNALING_PATHWAY_NETPATH-WIKIPW	28	00:14:00	34.3935573573038	27.4082275222931
SUMOYLATION_BY_RANBP2_REGULATES_TRANSCRIPTIONAL_REPRESSION-NCI_NATURE_V4_PID	28	00:14:00	33.2935573573038	27.2297695299583
P53_PATHWAY-NCI_NATURE_V4_PID	28	00:14:00	36.5935573573038	26.079614004997
MRNA_SPLICING-REACTOME_MsigDB_c2	28	00:13:00	26.0935573573038	25.1521646721456
PGC1A_PATHWAY-BIOCARTA_MsigDB_c2	29	00:18:00	57.6935573573038	50.5600889017242
SRF_AND_MIRS_IN_SMOOTH_MUSCLE_DIFFERENTIATION_AND_PROLIFERATION-WIKIPW	29	00:17:00	55.8935573573038	43.8511346764816
SIGNALING_EVENTS_MEDIATED_BY_HDAC_CLASS_III-NCI_NATURE_V4_PID	29	00:17:00	53.6935573573038	43.8133461155922
MEIOTIC_SYNAPSIS-REACTOME_MsigDB_c2	29	00:16:00	49.2935573573038	38.5807735005841
TRANSCRIPTION-REACTOME_MsigDB_c2	29	00:16:00	43.9935573573038	36.8713380625699
MYOGENESIS-REACTOME_MsigDB_c2	30	00:15:00	37.9935573573038	41.2112861242643
CTCF_PATHWAY-BIOCARTA_MsigDB_c2	30	00:15:00	37.8935573573038	39.5307995256223
HISTONE_MODIFICATIONS-WIKIPW	30	00:14:00	36.1935573573038	35.1143761112562
MTOR_PATHWAY-BIOCARTA_MsigDB_c2	30	00:14:00	31.7935573573038	29.7311593594049
ETS_PATHWAY-BIOCARTA_MsigDB_c2	30	00:14:00	31.1935573573038	28.1143761112562
PAR1_PATHWAY-BIOCARTA_MsigDB_c2	31	00:17:00	55.4935573573038	46.8925273616399
MYOGENESIS-REACTOME_MsigDB_c2	31	00:18:00	59.9935573573038	44.8133461155922
ACH_PATHWAY-BIOCARTA_MsigDB_c2	31	00:16:00	45.6935573573038	40.9382848522005
MTOR_PATHWAY-BIOCARTA_MsigDB_c2	31	00:16:00	46.7935573573038	39.0174660982482
HISTONE_MODIFICATIONS-WIKIPW	31	00:15:00	42.2935573573038	38.8318295212862
SIGNALING_PATHWAYS_IN_GLIOBLASTOMA-WIKIPW	33	00:02:00	72.6935573573038	82.7164361025842
NRAGE_SIGNALS_DEATH_THROUGH_JNK-REACTOME_MsigDB_c2	33	00:18:00	60.3935573573038	74.0474293216256
WNT_SIGNALING_PATHWAY_NETPATH-WIKIPW	33	00:19:00	65.0935573573038	69.8925273616398
COREGULATION_OF_ANDROGEN_RECEPTOR_ACTIVITY-NCI_NATURE_V4_PID	33	00:18:00	60.1935573573038	66.9631084359256
CTCF_PATHWAY-BIOCARTA_MsigDB_c2	33	00:19:00	66.5935573573038	66.0474293216256
GENERATION_OF_SECOND_MESSENGER_MOLECULES-REACTOME_MsigDB_c2	T-ALL	00:24:00	110.993557357304	164.675043417426
TCRA_PATHWAY-BIOCARTA_MsigDB_c2	T-ALL	00:22:00	90.1935573573038	151.746399325962
IL17_PATHWAY-BIOCARTA_MsigDB_c2	T-ALL	00:23:00	101.993557357304	130.017466098248
TRANSLOCATION_OF_ZAP_70_TO_IMMUNOLOGICAL_SYNAPSE-REACTOME_MsigDB_c2	T-ALL	00:02:00	79.1935573573038	129.795617348632
TCAPOPTOSIS_PATHWAY-BIOCARTA_MsigDB_c2	T-ALL	00:19:00	71.2935573573038	112.989437374648
GENERATION_OF_SECOND_MESSENGER_MOLECULES-REACTOME_MsigDB_c2	22	00:24:00	110.993557357304	164.675043417426
TCRA_PATHWAY-BIOCARTA_MsigDB_c2	22	00:22:00	90.1935573573038	151.746399325962
IL17_PATHWAY-BIOCARTA_MsigDB_c2	22	00:23:00	101.993557357304	130.017466098248
TRANSLOCATION_OF_ZAP_70_TO_IMMUNOLOGICAL_SYNAPSE-REACTOME_MsigDB_c2	22	00:02:00	79.1935573573038	129.795617348632
TCAPOPTOSIS_PATHWAY-BIOCARTA_MsigDB_c2	22	00:19:00	71.2935573573038	112.989437374648
DOWNREGULATION_OF_ERBB2_ERBB3_SIGNALING-REACTOME_MsigDB_c2	CLL	00:37:00	281.193557357304	Inf
BCR_SIGNALING_PATHWAY-NCI_NATURE_V4_PID	CLL	00:36:00	258.493557357304	Inf
INTESTINAL_IMMUNE_NETWORK_FOR_IGA_PRODUCTION-KEGG_MsigDB_c2	CLL	00:32:00	205.193557357304	266.851134676482
AUTOIMMUNE_THYROID_DISEASE-KEGG_MsigDB_c2	CLL	00:28:00	156.893557357304	221.38737738332
RARRXR_PATHWAY-BIOCARTA_MsigDB_c2	CLL	00:35:00	248.293557357304	217.87133806257
RARRXR_PATHWAY-BIOCARTA_MsigDB_c2	40	00:29:00	166.693557357304	209.079614004997
CD40_PATHWAY-BIOCARTA_MsigDB_c2	40	00:28:00	155.793557357304	178.914803756351
TNFR2_PATHWAY-BIOCARTA_MsigDB_c2	40	00:27:00	144.593557357304	178.469281487703
NFKB_IS_ACTIVATED_AND_SIGNALS_SURVIVAL-REACTOME_MsigDB_c2	40	00:28:00	151.493557357304	175.047429321626
DOWNREGULATION_OF_ERBB2_ERBB3_SIGNALING-REACTOME_MsigDB_c2	40	00:27:00	143.393557357304	171.079614004997
BCR_SIGNALING_PATHWAY-NCI_NATURE_V4_PID	42	00:25:00	119.593557357304	151.560088901724
DOWNREGULATION_OF_ERBB2_ERBB3_SIGNALING-REACTOME_MsigDB_c2	42	00:25:00	122.093557357304	150.591497365976
BCR_PATHWAY-BIOCARTA_MsigDB_c2	42	00:24:00	116.293557357304	134.795617348632
GENERIC_TRANSCRIPTION_PATHWAY-REACTOME_MsigDB_c2	42	00:26:00	133.693557357304	108.746399325962
INTESTINAL_IMMUNE_NETWORK_FOR_IGA_PRODUCTION-KEGG_MsigDB_c2	42	00:02:00	77.2935573573038	98.7311593594049
ETHER_LIPID_METABOLISM-KEGG_MsigDB_c2	Cancer_Lymphoma	00:45:00	292.193557357304	Inf
CYTOKINE_CYTOKINE_RECEPTOR_INTERACTION-KEGG_MsigDB_c2	Cancer_Lymphoma	00:42:00	292.193557357304	Inf
ECM_RECEPTOR_INTERACTION-KEGG_MsigDB_c2	Cancer_Lymphoma	00:51:00	292.193557357304	Inf
CELL_ADHESION_MOLECULES_CAMS-KEGG_MsigDB_c2	Cancer_Lymphoma	00:44:00	292.193557357304	Inf
COMPLEMENT_AND_COAGULATION_CASCADES-KEGG_MsigDB_c2	Cancer_Lymphoma	00:48:00	292.193557357304	Inf
INFLAMMATORY_RESPONSE_PATHWAY-WIKIPW	2	00:35:00	254.693557357304	Inf
ENDOCHONDRAL_OSSIFICATION-WIKIPW	2	00:34:00	232.693557357304	Inf
BETA1_INTEGRIN_CELL_SURFACE_INTERACTIONS-NCI_NATURE_V4_PID	2	00:34:00	238.893557357304	299.778584009333
UV_RESPONSE_DN-MsigDB_HALLMARKS	2	00:35:00	247.093557357304	299.445369330298
OSTEOBLAST_SIGNALING-WIKIPW	2	00:35:00	245.193557357304	283.649489312954
CLASSIC_PATHWAY-BIOCARTA_MsigDB_c2	14	00:26:00	137.293557357304	149.989437374648
PAN_CANCER_MIRNA_TARGET_NETWORK_INVOLVING_ECM_RECEPTOR_INTERACTIONS-WIKIPW	14	00:27:00	141.093557357304	145.914803756351
EPITHELIAL_MESENCHYMAL_TRANSITION-MsigDB_HALLMARKS	14	00:26:00	135.393557357304	144.254038104685
INITIAL_TRIGGERING_OF_COMPLEMENT-REACTOME_MsigDB_c2	14	00:26:00	130.793557357304	140.114376111256
BETA1_INTEGRIN_CELL_SURFACE_INTERACTIONS-NCI_NATURE_V4_PID	14	00:25:00	123.893557357304	139.152164672146
SYNDECAN_1_MEDIATED_SIGNALING_EVENTS-NCI_NATURE_V4_PID	26	00:26:00	132.193557357304	162.675043417426
BETA1_INTEGRIN_CELL_SURFACE_INTERACTIONS-NCI_NATURE_V4_PID	26	00:26:00	129.893557357304	155.079614004997
NCAM1_INTERACTIONS-REACTOME_MsigDB_c2	26	00:25:00	125.793557357304	151.047429321626
OSTEOBLAST_SIGNALING-WIKIPW	26	00:24:00	116.893557357304	144.079614004997
MTA3_PATHWAY-BIOCARTA_MsigDB_c2	26	00:25:00	125.993557357304	142.963108435926
UV_RESPONSE_DN-MsigDB_HALLMARKS	46	00:12:00	24.7935573573038	35.6253556332368
NETRIN1_SIGNALING-REACTOME_MsigDB_c2	46	00:13:00	27.4935573573038	35.1521646721456
SYNDECAN_1_MEDIATED_SIGNALING_EVENTS-NCI_NATURE_V4_PID	46	00:12:00	24.3935573573038	35.079614004997
NCAM1_INTERACTIONS-REACTOME_MsigDB_c2	46	00:12:00	25.2935573573038	34.8511346764816
EPHA4_PATHWAY-BIOCARTA_MsigDB_c2	46	00:14:00	31.4935573573038	34.7164361025842
PROCESSING_OF_INTRONLESS_PRE_MRNAS-REACTOME_MsigDB_c2	50	00:14:00	36.7935573573038	48.2540381046852
IL2_SIGNALING_EVENTS_MEDIATED_BY_STAT5-NCI_NATURE_V4_PID	50	00:14:00	33.4935573573038	47.9631084359256
MUSCLE_CONTRACTION-REACTOME_MsigDB_c2	50	00:14:00	36.8935573573038	47.778584009333
SMOOTH_MUSCLE_CONTRACTION-REACTOME_MsigDB_c2	50	00:15:00	37.9935573573038	47.5214594993681
MITOCHONDRIAL_GENE_EXPRESSION-WIKIPW	50	00:15:00	39.6935573573038	46.8511346764816
N_GLYCAN_BIOSYNTHESIS-KEGG_MsigDB_c2	Cancer_Myeloma	00:52:00	292.193557357304	Inf
PROTEIN_EXPORT-KEGG_MsigDB_c2	Cancer_Myeloma	00:51:00	292.193557357304	Inf
DIABETES_PATHWAYS-REACTOME_MsigDB_c2	Cancer_Myeloma	00:47:00	292.193557357304	Inf
METABOLISM_OF_PROTEINS-REACTOME_MsigDB_c2	Cancer_Myeloma	00:43:00	292.193557357304	Inf
ACTIVATION_OF_CHAPERONE_GENES_BY_XBP1S-REACTOME_MsigDB_c2	Cancer_Myeloma	00:46:00	292.193557357304	Inf
N_GLYCAN_BIOSYNTHESIS-KEGG_MsigDB_c2	20	00:35:00	244.493557357304	283.963108435926
PROTEIN_EXPORT-KEGG_MsigDB_c2	20	00:33:00	215.693557357304	247.469281487703
BIOSYNTHESIS_OF_THE_N_GLYCAN_PRECURSOR_DOLICHOL_LIPID_LINKED_OLIGOSACCHARIDE_LLO_AND_TRANSFER_TO_A_NASCENT_PROTEIN-REACTOME_MsigDB_c2	20	00:33:00	224.893557357304	246.079614004997
ASPARAGINE_N_LINKED_GLYCOSYLATION-REACTOME_MsigDB_c2	20	00:34:00	238.993557357304	236.45319466781
TRANSPORT_TO_THE_GOLGI_AND_SUBSEQUENT_MODIFICATION-REACTOME_MsigDB_c2	20	00:32:00	207.593557357304	216.301462754613
POST_TRANSLATIONAL_PROTEIN_MODIFICATION-REACTOME_MsigDB_c2	49	00:38:00	288.093557357304	Inf
SYNTHESIS_SECRETION_AND_INACTIVATION_OF_GLP1-REACTOME_MsigDB_c2	49	00:37:00	278.593557357304	Inf
N_GLYCAN_BIOSYNTHESIS-KEGG_MsigDB_c2	49	00:37:00	273.193557357304	Inf
PROTEIN_EXPORT-KEGG_MsigDB_c2	49	00:37:00	271.693557357304	Inf
SYNTHESIS_OF_SUBSTRATES_IN_N_GLYCAN_BIOSYTHESIS-REACTOME_MsigDB_c2	49	00:36:00	264.793557357304	Inf
HISTONE_MODIFICATIONS-WIKIPW	Cancer_Lymphoma_and_Cancer_Leukemia	00:37:00	271.493557357304	273.914803756351
REGULATION_OF_NUCLEAR_BETA_CATENIN_SIGNALING_AND_TARGET_GENE_TRANSCRIPTION-NCI_NATURE_V4_PID	Cancer_Lymphoma_and_Cancer_Leukemia	00:04:00	292.193557357304	158.716436102584
SYSTEMIC_LUPUS_ERYTHEMATOSUS-KEGG_MsigDB_c2	Cancer_Lymphoma_and_Cancer_Leukemia	00:31:00	196.093557357304	149.152164672146
COREGULATION_OF_ANDROGEN_RECEPTOR_ACTIVITY-NCI_NATURE_V4_PID	Cancer_Lymphoma_and_Cancer_Leukemia	00:37:00	281.293557357304	146.114376111256
P53_PATHWAY-NCI_NATURE_V4_PID	Cancer_Lymphoma_and_Cancer_Leukemia	00:37:00	273.193557357304	144.307066632131
MTOR_PATHWAY-BIOCARTA_MsigDB_c2	Cancer_Leukemia_and_Cancer_Myeloma	00:33:00	213.293557357304	164.367482554603
MYOGENESIS-REACTOME_MsigDB_c2	Cancer_Leukemia_and_Cancer_Myeloma	00:32:00	203.593557357304	154.461163597481
PEPTIDE_CHAIN_ELONGATION-REACTOME_MsigDB_c2	Cancer_Leukemia_and_Cancer_Myeloma	00:32:00	203.593557357304	150.41540610692
COREGULATION_OF_ANDROGEN_RECEPTOR_ACTIVITY-NCI_NATURE_V4_PID	Cancer_Leukemia_and_Cancer_Myeloma	00:02:00	77.4935573573038	145.285072338425
PACKAGING_OF_TELOMERE_ENDS-REACTOME_MsigDB_c2	Cancer_Leukemia_and_Cancer_Myeloma	00:34:00	237.393557357304	135.38737738332
COREGULATION_OF_ANDROGEN_RECEPTOR_ACTIVITY-NCI_NATURE_V4_PID	AML_and_pre-B-ALL	00:52:00	292.193557357304	Inf
METASTATIC_BRAIN_TUMOR-WIKIPW	AML_and_pre-B-ALL	00:43:00	292.193557357304	296.307066632131
MTOR_PATHWAY-BIOCARTA_MsigDB_c2	AML_and_pre-B-ALL	00:44:00	292.193557357304	240.602492750277
PAR1_MEDIATED_THROMBIN_SIGNALING_EVENTS-NCI_NATURE_V4_PID	AML_and_pre-B-ALL	00:38:00	287.393557357304	203.114376111256
REGULATION_OF_RETINOBLASTOMA_PROTEIN-NCI_NATURE_V4_PID	AML_and_pre-B-ALL	00:46:00	292.193557357304	186.017466098248
METASTATIC_BRAIN_TUMOR-WIKIPW	AML_and_T-ALL	00:37:00	273.893557357304	208.422705345662
PENTOSE_PHOSPHATE_PATHWAY-WIKIPW	AML_and_T-ALL	00:36:00	255.793557357304	133.851134676482
SIGNALING_BY_FGFR1_FUSION_MUTANTS-REACTOME_MsigDB_c2	AML_and_T-ALL	00:33:00	215.993557357304	129.675043417426
C_MYB_TRANSCRIPTION_FACTOR_NETWORK-NCI_NATURE_V4_PID	AML_and_T-ALL	00:31:00	197.093557357304	111.512316119928
HEMATOPOIETIC_STEM_CELL_DIFFERENTIATION-WIKIPW	AML_and_T-ALL	00:31:00	195.493557357304	111.202331281611
DOWNREGULATION_OF_ERBB2_ERBB3_SIGNALING-REACTOME_MsigDB_c2	AML_and_CLL	00:28:00	161.293557357304	129.318496093912
ELEVATION_OF_CYTOSOLIC_CA2_LEVELS-REACTOME_MsigDB_c2	AML_and_CLL	00:03:00	183.893557357304	117.249074685154
CORTICOTROPIN_RELEASING_HORMONE-WIKIPW	AML_and_CLL	00:03:00	185.693557357304	89.7164361025842
REGULATION_OF_ANDROGEN_RECEPTOR_ACTIVITY-NCI_NATURE_V4_PID	AML_and_CLL	00:03:00	182.993557357304	84.7956173486318
PLATELET_CALCIUM_HOMEOSTASIS-REACTOME_MsigDB_c2	AML_and_CLL	00:28:00	161.993557357304	80.5501046808176
MEIOTIC_SYNAPSIS-REACTOME_MsigDB_c2	T-ALL_and_pre-B-ALL	00:46:00	292.193557357304	Inf
HISTONE_MODIFICATIONS-WIKIPW	T-ALL_and_pre-B-ALL	00:05:00	292.193557357304	Inf
SIGNALING_PATHWAYS_IN_GLIOBLASTOMA-WIKIPW	T-ALL_and_pre-B-ALL	00:04:00	292.193557357304	288.778584009333
MEIOSIS-REACTOME_MsigDB_c2	T-ALL_and_pre-B-ALL	00:41:00	292.193557357304	267.851134676482
CTCF_PATHWAY-BIOCARTA_MsigDB_c2	T-ALL_and_pre-B-ALL	00:34:00	231.293557357304	256.778584009333
CTCF_PATHWAY-BIOCARTA_MsigDB_c2	pre-B-ALL_and_CLL	00:51:00	292.193557357304	Inf
PI_3K_CASCADE-REACTOME_MsigDB_c2	pre-B-ALL_and_CLL	00:45:00	292.193557357304	Inf
HISTONE_MODIFICATIONS-WIKIPW	pre-B-ALL_and_CLL	00:54:00	292.193557357304	Inf
SRF_AND_MIRS_IN_SMOOTH_MUSCLE_DIFFERENTIATION_AND_PROLIFERATION-WIKIPW	pre-B-ALL_and_CLL	00:46:00	292.193557357304	Inf
PI3K_EVENTS_IN_ERBB2_SIGNALING-REACTOME_MsigDB_c2	pre-B-ALL_and_CLL	00:45:00	292.193557357304	299.778584009333
DOWNREGULATION_OF_ERBB2_ERBB3_SIGNALING-REACTOME_MsigDB_c2	T-ALL_and_CLL	00:31:00	190.693557357304	210.716436102584
GENERIC_TRANSCRIPTION_PATHWAY-REACTOME_MsigDB_c2	T-ALL_and_CLL	00:03:00	174.293557357304	153.813346115592
ELEVATION_OF_CYTOSOLIC_CA2_LEVELS-REACTOME_MsigDB_c2	T-ALL_and_CLL	00:34:00	231.793557357304	152.762193593145
RARRXR_PATHWAY-BIOCARTA_MsigDB_c2	T-ALL_and_CLL	00:24:00	108.193557357304	136.269278071242
BCR_SIGNALING_PATHWAY-NCI_NATURE_V4_PID	T-ALL_and_CLL	00:17:00	50.1935573573038	131.540344843528
ASCORBATE_AND_ALDARATE_METABOLISM-KEGG_MsigDB_c2	Cancer_Lymphoma_and_Cancer_Myeloma	00:46:00	292.193557357304	Inf
N_GLYCAN_BIOSYNTHESIS-KEGG_MsigDB_c2	Cancer_Lymphoma_and_Cancer_Myeloma	00:04:00	292.193557357304	Inf
PROTEIN_EXPORT-KEGG_MsigDB_c2	Cancer_Lymphoma_and_Cancer_Myeloma	00:38:00	292.193557357304	Inf
CLASSIC_PATHWAY-BIOCARTA_MsigDB_c2	Cancer_Lymphoma_and_Cancer_Myeloma	00:58:00	292.193557357304	Inf
COMP_PATHWAY-BIOCARTA_MsigDB_c2	Cancer_Lymphoma_and_Cancer_Myeloma	00:56:00	292.193557357304	Inf

## Sheet: Epigenetic regulators
Table S6. Epigenetic regulator genes with existing small molecule drugs.
Gene list
AEBP2
ASH2L
ATAD2
ATAD2B
BAZ2A
BAZ2B
BPTF
BRD1
BRD2
BRD3
BRD4
BRD7
BRD9
BRDT
BRPF1
BRPF3
CARM1
CBX1
CBX7
CREBBP
DNMT1
DNMT3A
DNMT3B
DNMT3L
DOT1L
EED
EHMT1
EHMT2
EP300
EZH1
EZH2
HDAC1
HDAC10
HDAC11
HDAC2
HDAC3
HDAC4
HDAC5
HDAC6
HDAC7
HDAC8
HDAC9
KAT2A
KAT2B
KAT5
KAT8
KDM1A
KDM1B
KDM2A
KDM3A
KDM4A
KDM4C
KDM4D
KDM4E
KDM5A
KDM5C
KDM6A
KDM6B
KDM7A
KMT2A
KMT2B
KMT2C
KMT2D
L3MBTL1
L3MBTL3
L3MBTL4
LOC102723386
LOC102724071
LOC102724277
LOC102724718
LOC102725056
LOC102725372
MBTD1
MEN1
MPHOSPH8
NCOA1
NCOA3
PBRM1
PHF13
PHF23
PHF8
PHIP
PPARG
PRMT1
PRMT3
PRMT5
PRMT6
PRMT8
RBBP4
RBBP5
SETD2
SETD7
SETD8
SETDB1
SETMAR
SFMBT1
SIRT1
SIRT2
SIRT3
SIRT4
SIRT5
SIRT6
SIRT7
SMARCA2
SMARCA4
SMN1
SMN2
SMYD2
SMYD3
STK31
SUV39H1
SUV39H2
SUV420H1
SUV420H2
SUZ12
TAF1
TAF1L
TP53BP1
TRIM24
TRIM33
UHRF1
WDR5
WHSC1
WHSC1L1

## Sheet: Mutation info CLL candidates
Symbol	Name	# Total Donors affected (CLL)	# Total Donors affected (blood cancers)	# Across all Projects	# Mutations	Affected Donors by study
EHMT1	euchromatic histone-lysine N-methyltransferase 1	14 / 35 (40.00%)	129 / 203 (63.55%)	129 / 12,068 (1.07%)	266	CLLE-ES:14/219|CMDI-UK:4/136|LAML-KR:13/125|MALY-DE:90/241|NKTL-SG:8/23
SFMBT1	Scm-like with four mbt domains 1	9 / 35 (25.71%)	64 / 203 (31.53%)	64 / 12,068 (0.53%)	89	CLLE-ES:9/219|CMDI-UK:1/136|LAML-KR:2/125|MALY-DE:48/241|NKTL-SG:4/23
EZH1	enhancer of zeste homolog 1 (Drosophila)	4 / 35 (11.43%)	33 / 203 (16.26%)	33 / 12,068 (0.27%)	36	CLLE-ES:4/219|LAML-KR:1/125|MALY-DE:25/241|NKTL-SG:3/23
CBX7	chromobox homolog 7	4 / 35 (11.43%)	26 / 203 (12.81%)	26 / 12,068 (0.22%)	30	CLLE-ES:4/219|CMDI-UK:1/136|LAML-KR:2/125|MALY-DE:18/241|NKTL-SG:1/23
BAZ2A	bromodomain adjacent to zinc finger domain, 2A	3 / 35 (8.57%)	25 / 203 (12.32%)	25 / 12,068 (0.21%)	32	CLLE-ES:3/219|CMDI-UK:2/136|LAML-KR:2/125|MALY-DE:18/241
KMT2B	lysine (K)-specific methyltransferase 2B	2 / 35 (5.71%)	18 / 203 (8.87%)	18 / 12,068 (0.15%)	21	CLLE-ES:2/219|LAML-KR:4/125|MALY-DE:10/241|NKTL-SG:2/23
